# Supplementary material for: Structure and electrochemical properties of (μ-O)2Mn2(iii,iii) and (μ-O)2Mn2(iii,iv) complexes supported by pyridine-, quinoline-, isoquinoline- and quinoxaline-based tetranitrogen ligands
Source: Royal Society of Chemistry journal article supplement (doi:10.1039/d1dt00184a), 2021-01-01
Supplement: d1dt00184a1.pdf [file d1dt00184a1.pdf]

Supplementary Information for  
**Structure and electrochemical properties of ( $\mu$ -O)<sub>2</sub>Mn<sub>2</sub>(III,III) and ( $\mu$ -O)<sub>2</sub>Mn<sub>2</sub>(III,IV) complexes supported by pyridine-, quinoline-, isoquinoline- and quinoxaline-based tetranitrogen ligands**

Yuji Mikata,<sup>a,b,c,\*</sup> Yasuko Kuroda,<sup>b</sup> Kyoko Naito,<sup>b</sup> Kana Murakami,<sup>b</sup> Chihiro Yamamoto,<sup>a</sup> Shoko Yabe,<sup>a</sup> Shizuka Yonemura,<sup>a</sup> Arimasa Matsumoto<sup>a</sup> and Hajime Katano<sup>d</sup>

<sup>a</sup>*Department of Chemistry, Biology, and Environmental Science, Faculty of Science, Nara Women's University, Nara 630-8506, Japan*

<sup>b</sup>*Department of Chemistry, Faculty of Science, Nara Women's University, Nara 630-8506 Japan*

<sup>c</sup>*KYOUSEI Science Center, Nara Women's University, Nara 630-8506, Japan*

<sup>d</sup>*Department of Bioscience, Fukui Prefectural University, Fukui 910-1195, Japan*

**Table S1.** Crystallographic data for **L12**·HClO<sub>4</sub> and [Mn(**L4**)(CH<sub>3</sub>CN)<sub>3</sub>](ClO<sub>4</sub>)<sub>2</sub>

|                                                                     | <b>L12</b> ·HClO <sub>4</sub>                                   | [Mn( <b>L4</b> )(CH <sub>3</sub> CN) <sub>3</sub> ]-<br>(ClO <sub>4</sub> ) <sub>2</sub> |
|---------------------------------------------------------------------|-----------------------------------------------------------------|------------------------------------------------------------------------------------------|
| Formula                                                             | C <sub>28</sub> H <sub>33</sub> ClN <sub>4</sub> O <sub>4</sub> | C <sub>36</sub> H <sub>33</sub> Cl <sub>2</sub> MnN <sub>7</sub> O <sub>8</sub>          |
| FW                                                                  | 525.05                                                          | 817.54                                                                                   |
| Crystal system                                                      | triclinic                                                       | triclinic                                                                                |
| Space group                                                         | <i>P</i> -1                                                     | <i>P</i> -1                                                                              |
| <i>a</i> , Å                                                        | 9.2827(8)                                                       | 12.156(5)                                                                                |
| <i>b</i> , Å                                                        | 11.7724(15)                                                     | 12.543(5)                                                                                |
| <i>c</i> , Å                                                        | 12.7181(13)                                                     | 14.590(6)                                                                                |
| $\alpha$ , deg                                                      | 107.289(5)                                                      | 104.912(3)                                                                               |
| $\beta$ , deg                                                       | 100.460(2)                                                      | 109.608(4)                                                                               |
| $\gamma$ , deg                                                      | 93.730(4)                                                       | 106.407(2)                                                                               |
| <i>V</i> , Å <sup>3</sup>                                           | 1294.5(2)                                                       | 1851.3(14)                                                                               |
| <i>Z</i>                                                            | 2                                                               | 2                                                                                        |
| <i>D</i> <sub>calc</sub> , g cm <sup>-3</sup>                       | 1.347                                                           | 1.466                                                                                    |
| $\mu$ , mm <sup>-1</sup>                                            | 0.1896                                                          | 0.5622                                                                                   |
| 2 $\theta$ <sub>max</sub> , deg                                     | 55                                                              | 55                                                                                       |
| temp, K                                                             | 173                                                             | 153                                                                                      |
| no. reflns collected                                                | 10067                                                           | 14482                                                                                    |
| no. reflns used                                                     | 5627                                                            | 8079                                                                                     |
| no. of params                                                       | 466                                                             | 490                                                                                      |
| <i>R</i> <sub>int</sub>                                             | 0.0144                                                          | 0.0243                                                                                   |
| Final <i>R</i> 1 ( <i>I</i> > 2 $\sigma$ ( <i>I</i> )) <sup>a</sup> | 0.0481                                                          | 0.0626                                                                                   |
| <i>wR</i> 2 (all data) <sup>b</sup>                                 | 0.1346                                                          | 0.1741                                                                                   |
| GOF                                                                 | 1.040                                                           | 1.070                                                                                    |

<sup>a</sup>*R*1 =  $\sum ||F_o| - |F_c|| / \sum |F_o|$ . <sup>b</sup>*wR*2 =  $[\sum w[(F_o^2 - F_c^2)^2] / \sum [w(F_o^2)^2]]^{1/2}$ .

**Table S2.** Crystallographic data for 4·3CH<sub>3</sub>CN and 5·2CH<sub>3</sub>CN

|                                                            | 4·3CH <sub>3</sub> CN                                                                           | 5·2CH <sub>3</sub> CN                                                                           |
|------------------------------------------------------------|-------------------------------------------------------------------------------------------------|-------------------------------------------------------------------------------------------------|
| Formula                                                    | C <sub>66</sub> H <sub>57</sub> Cl <sub>3</sub> Mn <sub>2</sub> N <sub>11</sub> O <sub>14</sub> | C <sub>52</sub> H <sub>58</sub> Cl <sub>3</sub> Mn <sub>2</sub> N <sub>10</sub> O <sub>14</sub> |
| FW                                                         | 1444.48                                                                                         | 1263.32                                                                                         |
| Crystal system                                             | monoclinic                                                                                      | monoclinic                                                                                      |
| Space group                                                | <i>Cc</i>                                                                                       | <i>P2<sub>1</sub>/n</i>                                                                         |
| <i>a</i> , Å                                               | 23.2584(13)                                                                                     | 12.3782(19)                                                                                     |
| <i>b</i> , Å                                               | 20.6984(9)                                                                                      | 17.197(3)                                                                                       |
| <i>c</i> , Å                                               | 13.4561(9)                                                                                      | 25.590(4)                                                                                       |
| β, deg                                                     | 98.163(3)                                                                                       | 93.913(3)                                                                                       |
| <i>V</i> , Å <sup>3</sup>                                  | 6412.3(6)                                                                                       | 5434.8(14)                                                                                      |
| <i>Z</i>                                                   | 4                                                                                               | 4                                                                                               |
| <i>D</i> <sub>calc</sub> , g cm <sup>-3</sup>              | 1.496                                                                                           | 1.544                                                                                           |
| μ, mm <sup>-1</sup>                                        | 0.5947                                                                                          | 0.6884                                                                                          |
| 2θ <sub>max</sub> , deg                                    | 55                                                                                              | 55                                                                                              |
| temp, K                                                    | 153                                                                                             | 123                                                                                             |
| no. reflns collected                                       | 24976                                                                                           | 42026                                                                                           |
| no. reflns used                                            | 10690                                                                                           | 12400                                                                                           |
| no. of params                                              | 868                                                                                             | 736                                                                                             |
| <i>R</i> <sub>int</sub>                                    | 0.0328                                                                                          | 0.0436                                                                                          |
| Final <i>R</i> 1 ( <i>I</i> > 2σ( <i>I</i> )) <sup>a</sup> | 0.0471                                                                                          | 0.0485                                                                                          |
| <i>wR</i> 2 (all data) <sup>b</sup>                        | 0.1180                                                                                          | 0.1243                                                                                          |
| GOF                                                        | 1.081                                                                                           | 1.092                                                                                           |

<sup>a</sup>*R*1 = Σ||*F*<sub>o</sub>| - |*F*<sub>c</sub>||/Σ|*F*<sub>o</sub>|. <sup>b</sup>*wR*2 = [Σ*w*[(*F*<sub>o</sub><sup>2</sup> - *F*<sub>c</sub><sup>2</sup>)<sup>2</sup>]/Σ[*w*(*F*<sub>o</sub><sup>2</sup>)<sup>2</sup>]<sup>1/2</sup>.

**Table S3.** Crystallographic data for 6·4CH<sub>3</sub>CN·H<sub>2</sub>O and 7·4CH<sub>3</sub>CN·H<sub>2</sub>O

|                                                            | 6·4CH <sub>3</sub> CN·H <sub>2</sub> O                                                          | 7·4CH <sub>3</sub> CN·H <sub>2</sub> O                                                          |
|------------------------------------------------------------|-------------------------------------------------------------------------------------------------|-------------------------------------------------------------------------------------------------|
| Formula                                                    | C <sub>64</sub> H <sub>78</sub> Cl <sub>3</sub> Mn <sub>2</sub> N <sub>12</sub> O <sub>15</sub> | C <sub>68</sub> H <sub>62</sub> Cl <sub>3</sub> Mn <sub>2</sub> N <sub>12</sub> O <sub>15</sub> |
| FW                                                         | 1471.63                                                                                         | 1503.54                                                                                         |
| Crystal system                                             | monoclinic                                                                                      | monoclinic                                                                                      |
| Space group                                                | C2/c                                                                                            | Cc                                                                                              |
| <i>a</i> , Å                                               | 25.494(2)                                                                                       | 14.7283(10)                                                                                     |
| <i>b</i> , Å                                               | 19.1689(11)                                                                                     | 22.1188(14)                                                                                     |
| <i>c</i> , Å                                               | 19.1973(17)                                                                                     | 21.6214(14)                                                                                     |
| β, deg                                                     | 132.362(2)                                                                                      | 101.584(3)                                                                                      |
| <i>V</i> , Å <sup>3</sup>                                  | 6932.1(10)                                                                                      | 6900.2(8)                                                                                       |
| <i>Z</i>                                                   | 4                                                                                               | 4                                                                                               |
| <i>D</i> <sub>calc</sub> , g cm <sup>-3</sup>              | 1.410                                                                                           | 1.447                                                                                           |
| μ, mm <sup>-1</sup>                                        | 0.5525                                                                                          | 0.5572                                                                                          |
| 2θ <sub>max</sub> , deg                                    | 55                                                                                              | 55                                                                                              |
| temp, K                                                    | 153                                                                                             | 153                                                                                             |
| no. reflns collected                                       | 33734                                                                                           | 33906                                                                                           |
| no. reflns used                                            | 7928                                                                                            | 14719                                                                                           |
| no. of params                                              | 471                                                                                             | 932                                                                                             |
| <i>R</i> <sub>int</sub>                                    | 0.0418                                                                                          | 0.0286                                                                                          |
| Final <i>R</i> 1 ( <i>I</i> > 2σ( <i>I</i> )) <sup>a</sup> | 0.0789                                                                                          | 0.0741                                                                                          |
| <i>wR</i> 2 (all data) <sup>b</sup>                        | 0.2376                                                                                          | 0.2129                                                                                          |
| GOF                                                        | 1.085                                                                                           | 1.096                                                                                           |

$$^a R1 = \sum ||F_o| - |F_c|| / \sum |F_o|. \quad ^b wR2 = [\sum w[(F_o^2 - F_c^2)^2] / \sum [w(F_o^2)^2]]^{1/2}.$$

**Table S4.** Crystallographic data for **8·4CH<sub>3</sub>CN** and **9·3CH<sub>3</sub>CN·2.5H<sub>2</sub>O**

|                                                                     | <b>8·4CH<sub>3</sub>CN</b>                                                                      | <b>9·3CH<sub>3</sub>CN·2.5H<sub>2</sub>O</b>                                                      |
|---------------------------------------------------------------------|-------------------------------------------------------------------------------------------------|---------------------------------------------------------------------------------------------------|
| Formula                                                             | C <sub>56</sub> H <sub>64</sub> Cl <sub>3</sub> Mn <sub>2</sub> N <sub>12</sub> O <sub>14</sub> | C <sub>62</sub> H <sub>78</sub> Cl <sub>3</sub> Mn <sub>2</sub> N <sub>11</sub> O <sub>16.5</sub> |
| FW                                                                  | 1345.43                                                                                         | 1457.6                                                                                            |
| Crystal system                                                      | monoclinic                                                                                      | triclinic                                                                                         |
| Space group                                                         | <i>P2<sub>1</sub>/c</i>                                                                         | <i>P-1</i>                                                                                        |
| <i>a</i> , Å                                                        | 18.4506(18)                                                                                     | 11.2594(3)                                                                                        |
| <i>b</i> , Å                                                        | 13.8386(12)                                                                                     | 14.51210(10)                                                                                      |
| <i>c</i> , Å                                                        | 24.104(3)                                                                                       | 22.1759(5)                                                                                        |
| $\alpha$ , deg                                                      | 90                                                                                              | 75.873(7)                                                                                         |
| $\beta$ , deg                                                       | 99.862(4)                                                                                       | 84.419(7)                                                                                         |
| $\gamma$ , deg                                                      | 90                                                                                              | 74.520(5)                                                                                         |
| <i>V</i> , Å <sup>3</sup>                                           | 6932.1(10)                                                                                      | 3384.43(17)                                                                                       |
| <i>Z</i>                                                            | 4                                                                                               | 2                                                                                                 |
| <i>D</i> <sub>calc</sub> , g cm <sup>-3</sup>                       | 1.474                                                                                           | 1.430                                                                                             |
| $\mu$ , mm <sup>-1</sup>                                            | 0.6229                                                                                          | 0.5662                                                                                            |
| 2 $\theta$ <sub>max</sub> , deg                                     | 55                                                                                              | 55                                                                                                |
| temp, K                                                             | 153                                                                                             | 153                                                                                               |
| no. reflns collected                                                | 58369                                                                                           | 33529                                                                                             |
| no. reflns used                                                     | 13847                                                                                           | 15261                                                                                             |
| no. of params                                                       | 818                                                                                             | 916                                                                                               |
| <i>R</i> <sub>int</sub>                                             | 0.0479                                                                                          | 0.0266                                                                                            |
| Final <i>R</i> 1 ( <i>I</i> > 2 $\sigma$ ( <i>I</i> )) <sup>a</sup> | 0.0809                                                                                          | 0.0655                                                                                            |
| <i>wR</i> 2 (all data) <sup>b</sup>                                 | 0.2149                                                                                          | 0.1973                                                                                            |
| GOF                                                                 | 1.144                                                                                           | 1.053                                                                                             |

<sup>a</sup>*R*1 =  $\sum ||F_o| - |F_c|| / \sum |F_o|$ . <sup>b</sup>*wR*2 =  $[\sum w[(F_o^2 - F_c^2)^2] / \sum [w(F_o^2)^2]]^{1/2}$ .

**Table S5.** Crystallographic data for **12**·CH<sub>3</sub>OH and [Mn(**L15**)(CH<sub>3</sub>O)<sub>2</sub>]ClO<sub>4</sub>·CH<sub>3</sub>CN

|                                                            | <b>12</b> ·CH <sub>3</sub> OH                                                                  | [Mn( <b>L15</b> )(OCH <sub>3</sub> ) <sub>2</sub> ]-<br>ClO <sub>4</sub> ·CH <sub>3</sub> CN |
|------------------------------------------------------------|------------------------------------------------------------------------------------------------|----------------------------------------------------------------------------------------------|
| Formula                                                    | C <sub>57</sub> H <sub>68</sub> Cl <sub>2</sub> Mn <sub>2</sub> N <sub>8</sub> O <sub>11</sub> | C <sub>30</sub> H <sub>39</sub> ClMnN <sub>7</sub> O <sub>6</sub>                            |
| FW                                                         | 1221.99                                                                                        | 684.07                                                                                       |
| Crystal system                                             | monoclinic                                                                                     | monoclinic                                                                                   |
| Space group                                                | <i>P2</i> <sub>1</sub>                                                                         | <i>P2</i> <sub>1</sub> / <i>c</i>                                                            |
| <i>a</i> , Å                                               | 9.302(3)                                                                                       | 8.601(4)                                                                                     |
| <i>b</i> , Å                                               | 12.216(3)                                                                                      | 35.692(18)                                                                                   |
| <i>c</i> , Å                                               | 24.174(7)                                                                                      | 10.382(5)                                                                                    |
| β, deg                                                     | 99.794(3)                                                                                      | 96.789(4)                                                                                    |
| <i>V</i> , Å <sup>3</sup>                                  | 2706.8(13)                                                                                     | 3165(3)                                                                                      |
| <i>Z</i>                                                   | 2                                                                                              | 4                                                                                            |
| <i>D</i> <sub>calc</sub> , g cm <sup>-3</sup>              | 1.499                                                                                          | 1.436                                                                                        |
| μ, mm <sup>-1</sup>                                        | 0.6357                                                                                         | 0.5558                                                                                       |
| 2θ <sub>max</sub> , deg                                    | 55                                                                                             | 55                                                                                           |
| temp, K                                                    | 173                                                                                            | 153                                                                                          |
| no. reflns collected                                       | 27040                                                                                          | 30798                                                                                        |
| no. reflns used                                            | 1184                                                                                           | 7244                                                                                         |
| no. of params                                              | 735                                                                                            | 420                                                                                          |
| <i>R</i> <sub>int</sub>                                    | 0.0263                                                                                         | 0.0350                                                                                       |
| Final <i>R</i> 1 ( <i>I</i> > 2σ( <i>I</i> )) <sup>a</sup> | 0.0423                                                                                         | 0.0511                                                                                       |
| <i>wR</i> 2 (all data) <sup>b</sup>                        | 0.1103                                                                                         | 0.1321                                                                                       |
| GOF                                                        | 1.077                                                                                          | 1.077                                                                                        |

$$^a R1 = \sum ||F_o| - |F_c|| / \sum |F_o|. \quad ^b wR2 = [\sum w[(F_o^2 - F_c^2)^2] / \sum [w(F_o^2)^2]]^{1/2}.$$

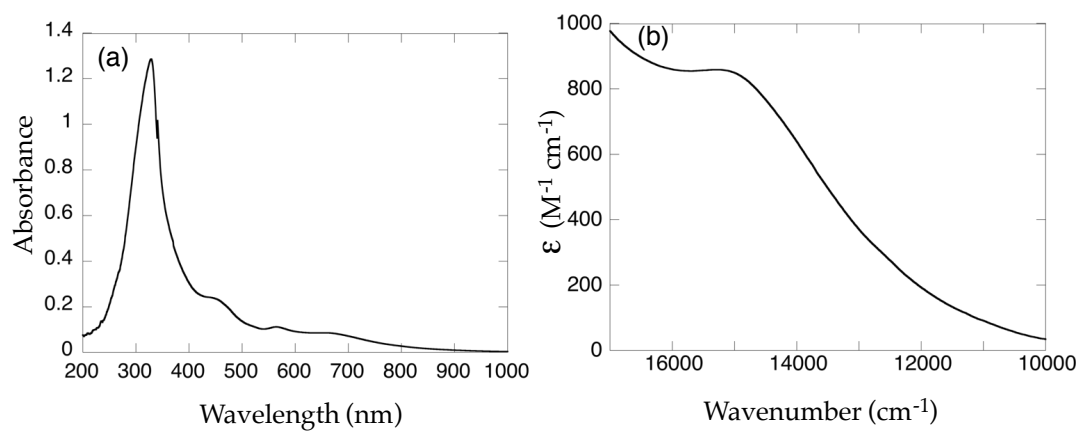

**Fig. S1.** UV-vis spectrum of **4** in acetonitrile in  $1.0 \times 10^{-5}$  M concentration. (a) Whole spectrum. (b) Expansion of 10000-17000  $\text{cm}^{-1}$  region.

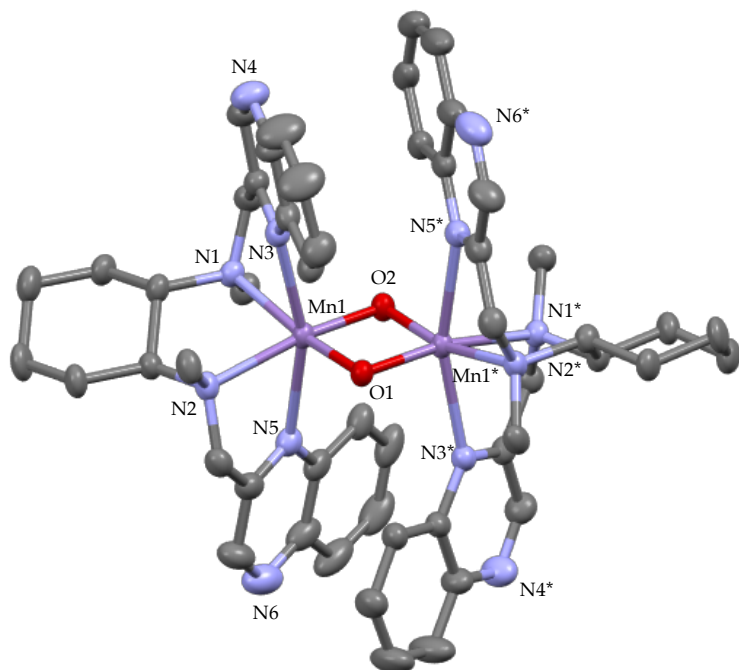

**Fig. S2.** Perspective view of cationic portion of **15** from preliminary X-ray crystallography.



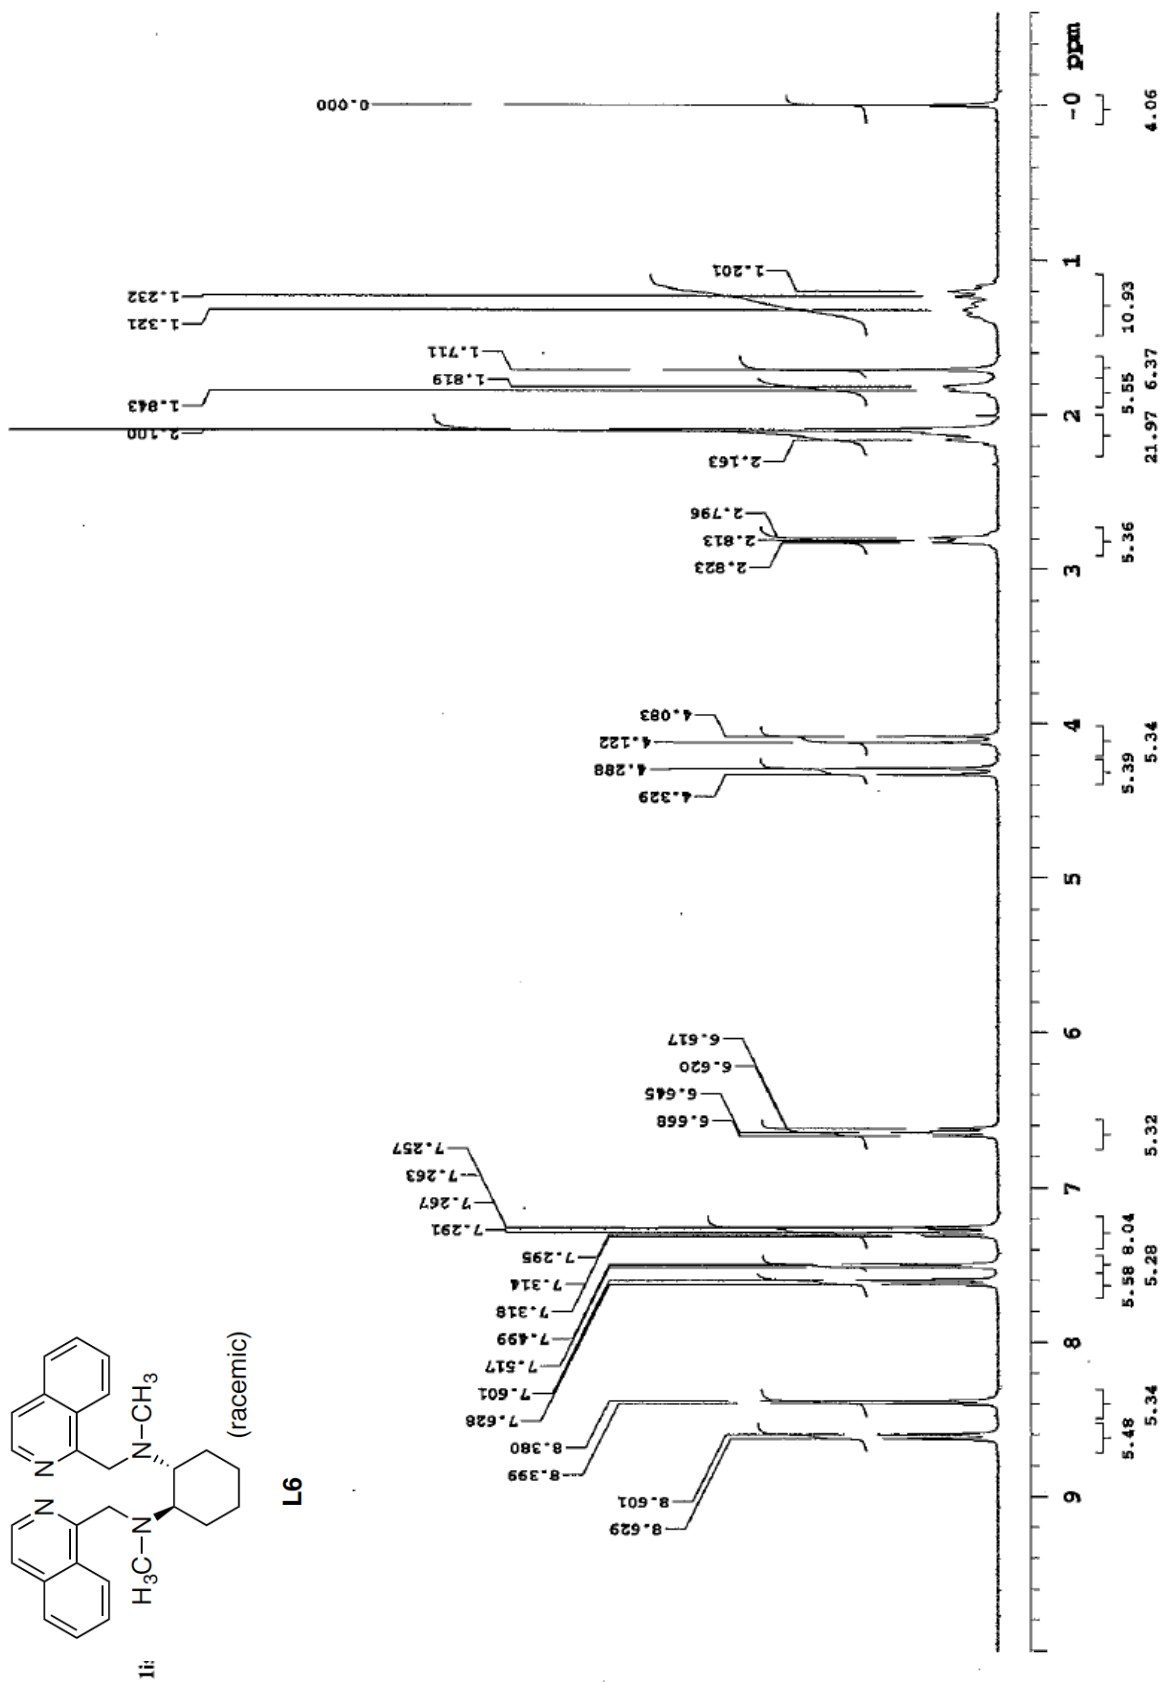

Figure S3.  $^1\text{H}$  NMR spectrum of L6 in  $\text{CDCl}_3$ .

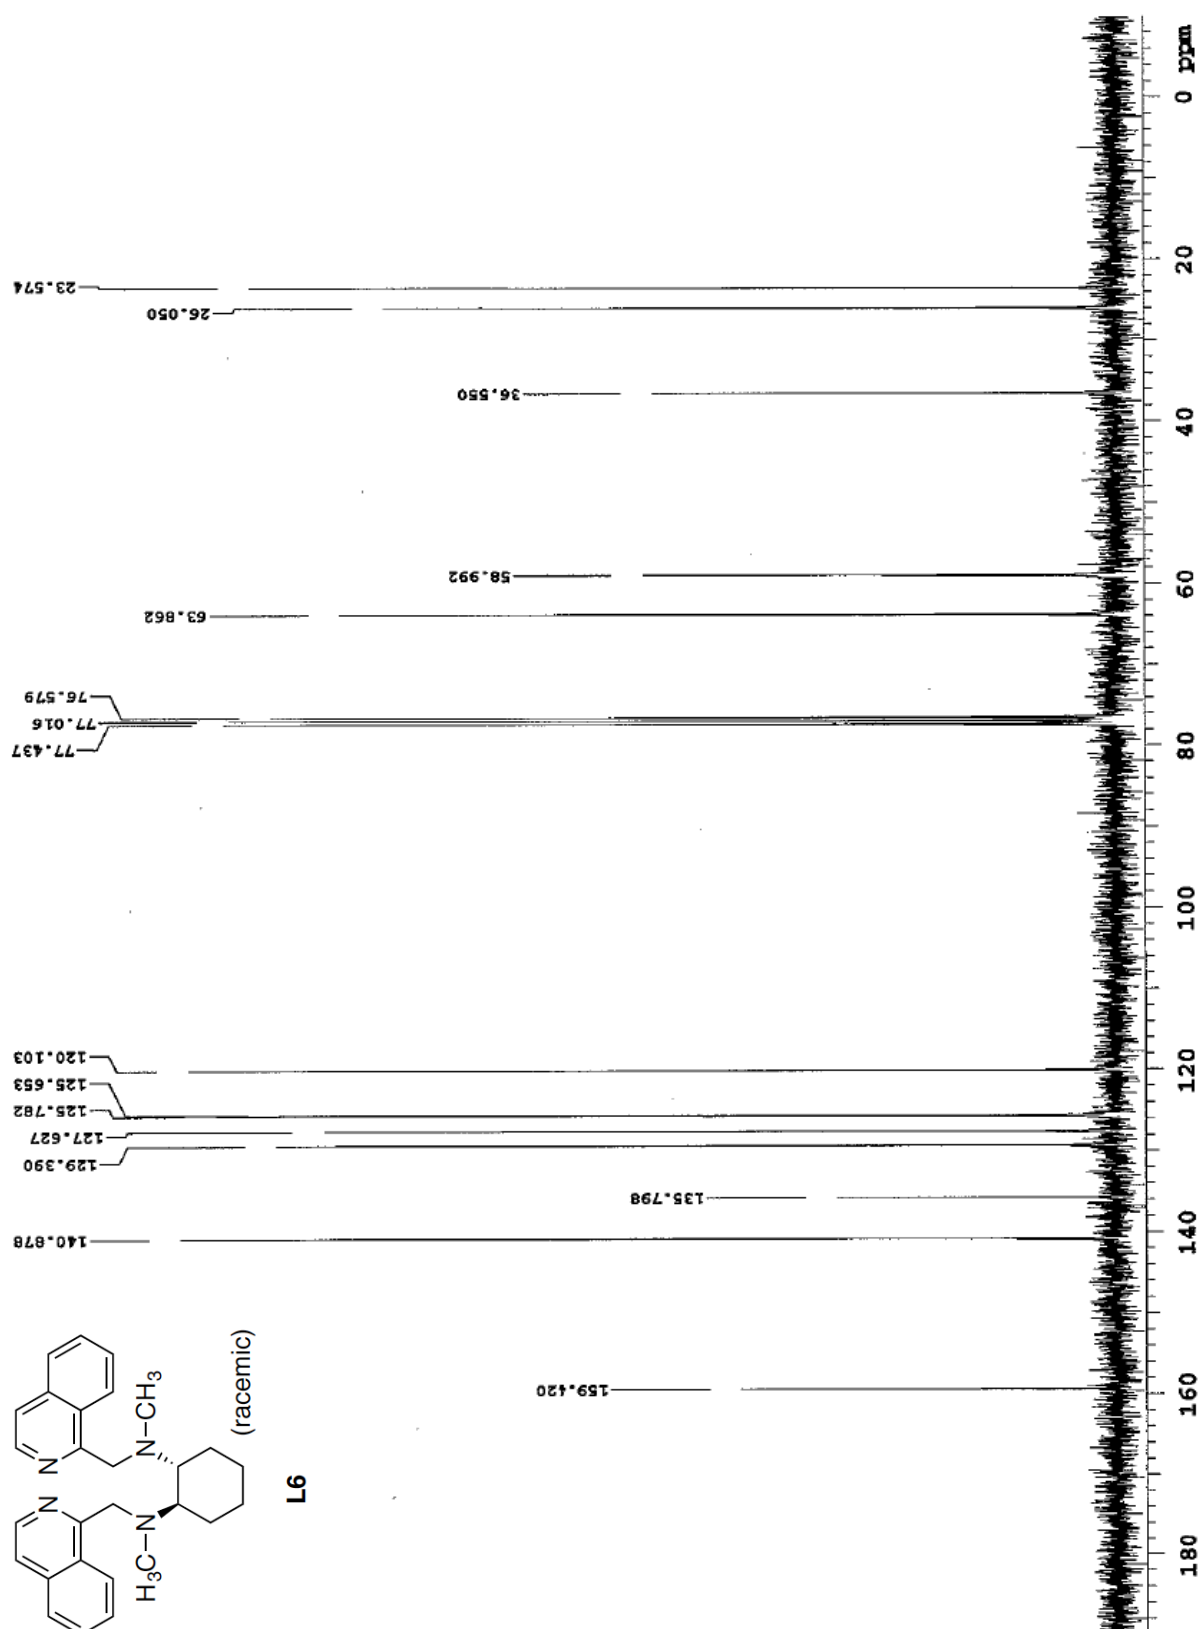

Figure S4.  $^{13}\text{C}$  NMR spectrum of L6 in  $\text{CDCl}_3$ .

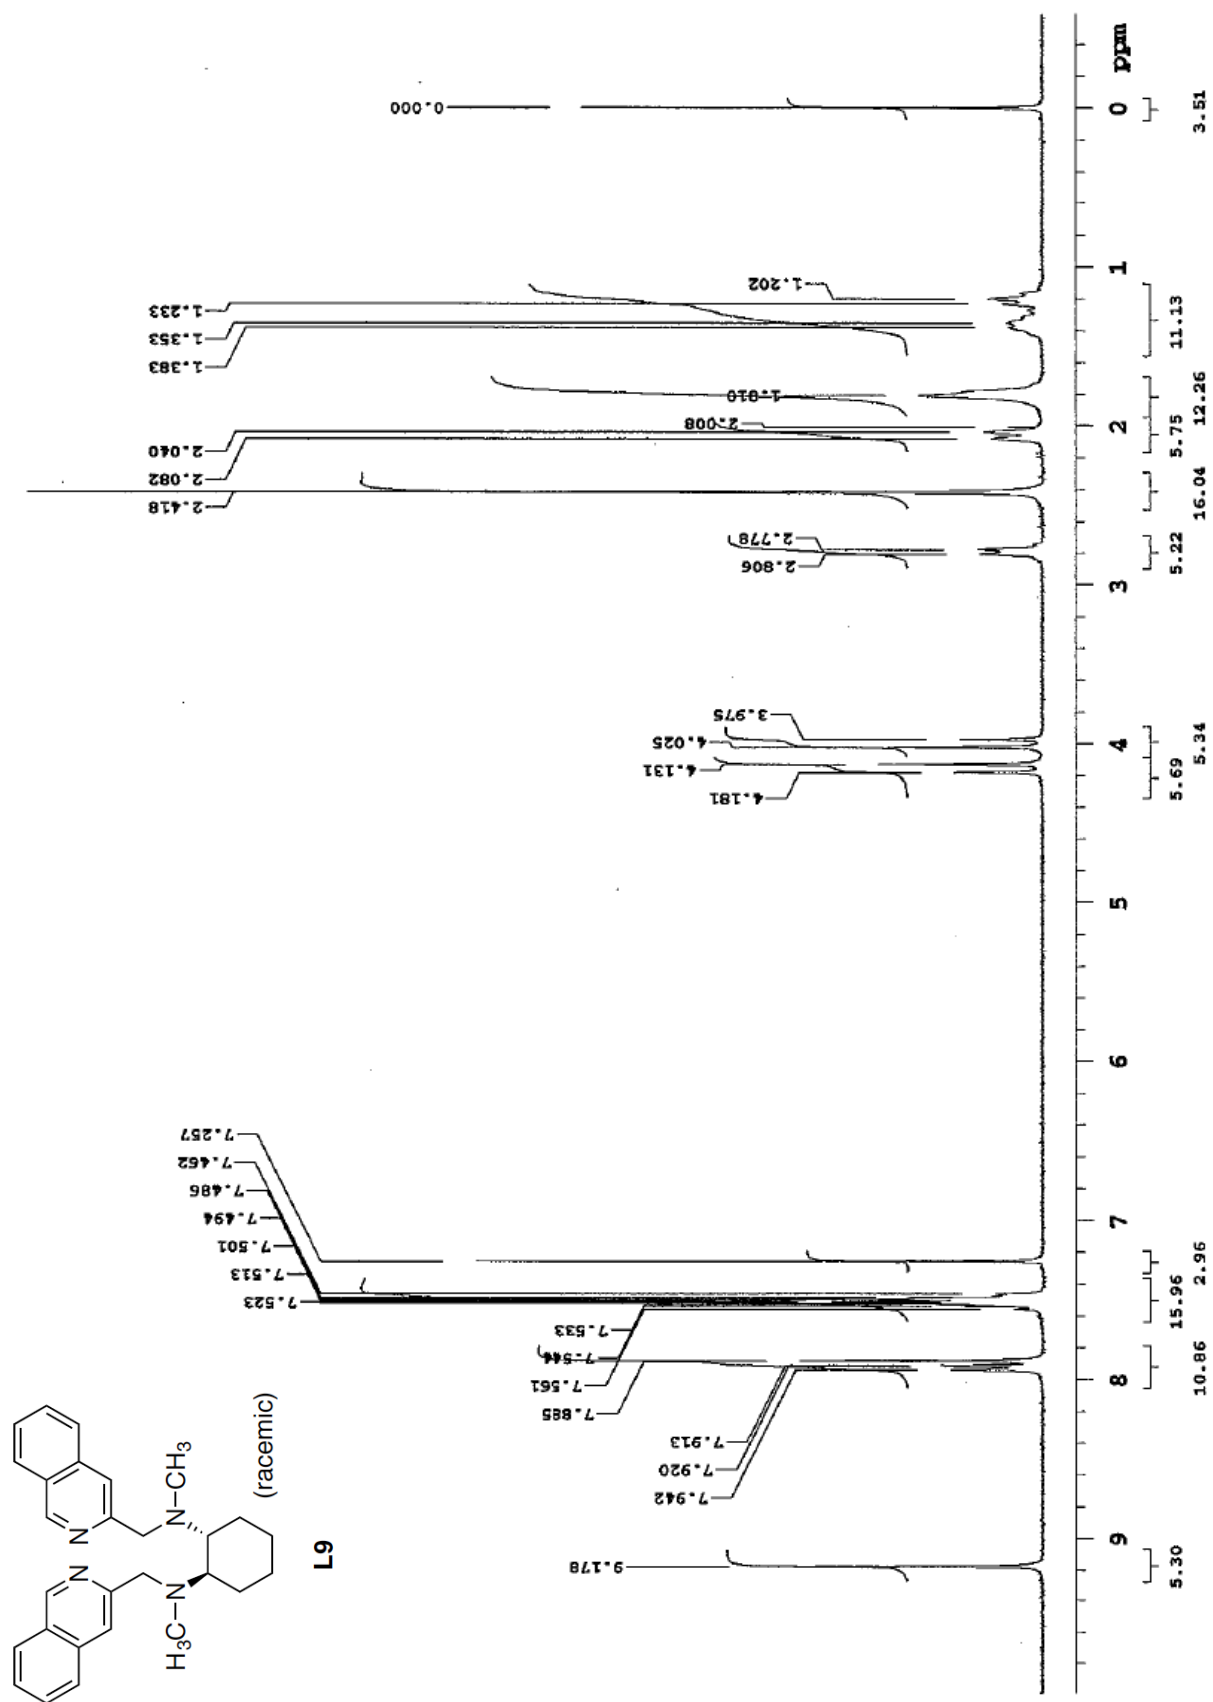

Figure S5. <sup>1</sup>H NMR spectrum of L9 in CDCl<sub>3</sub>.

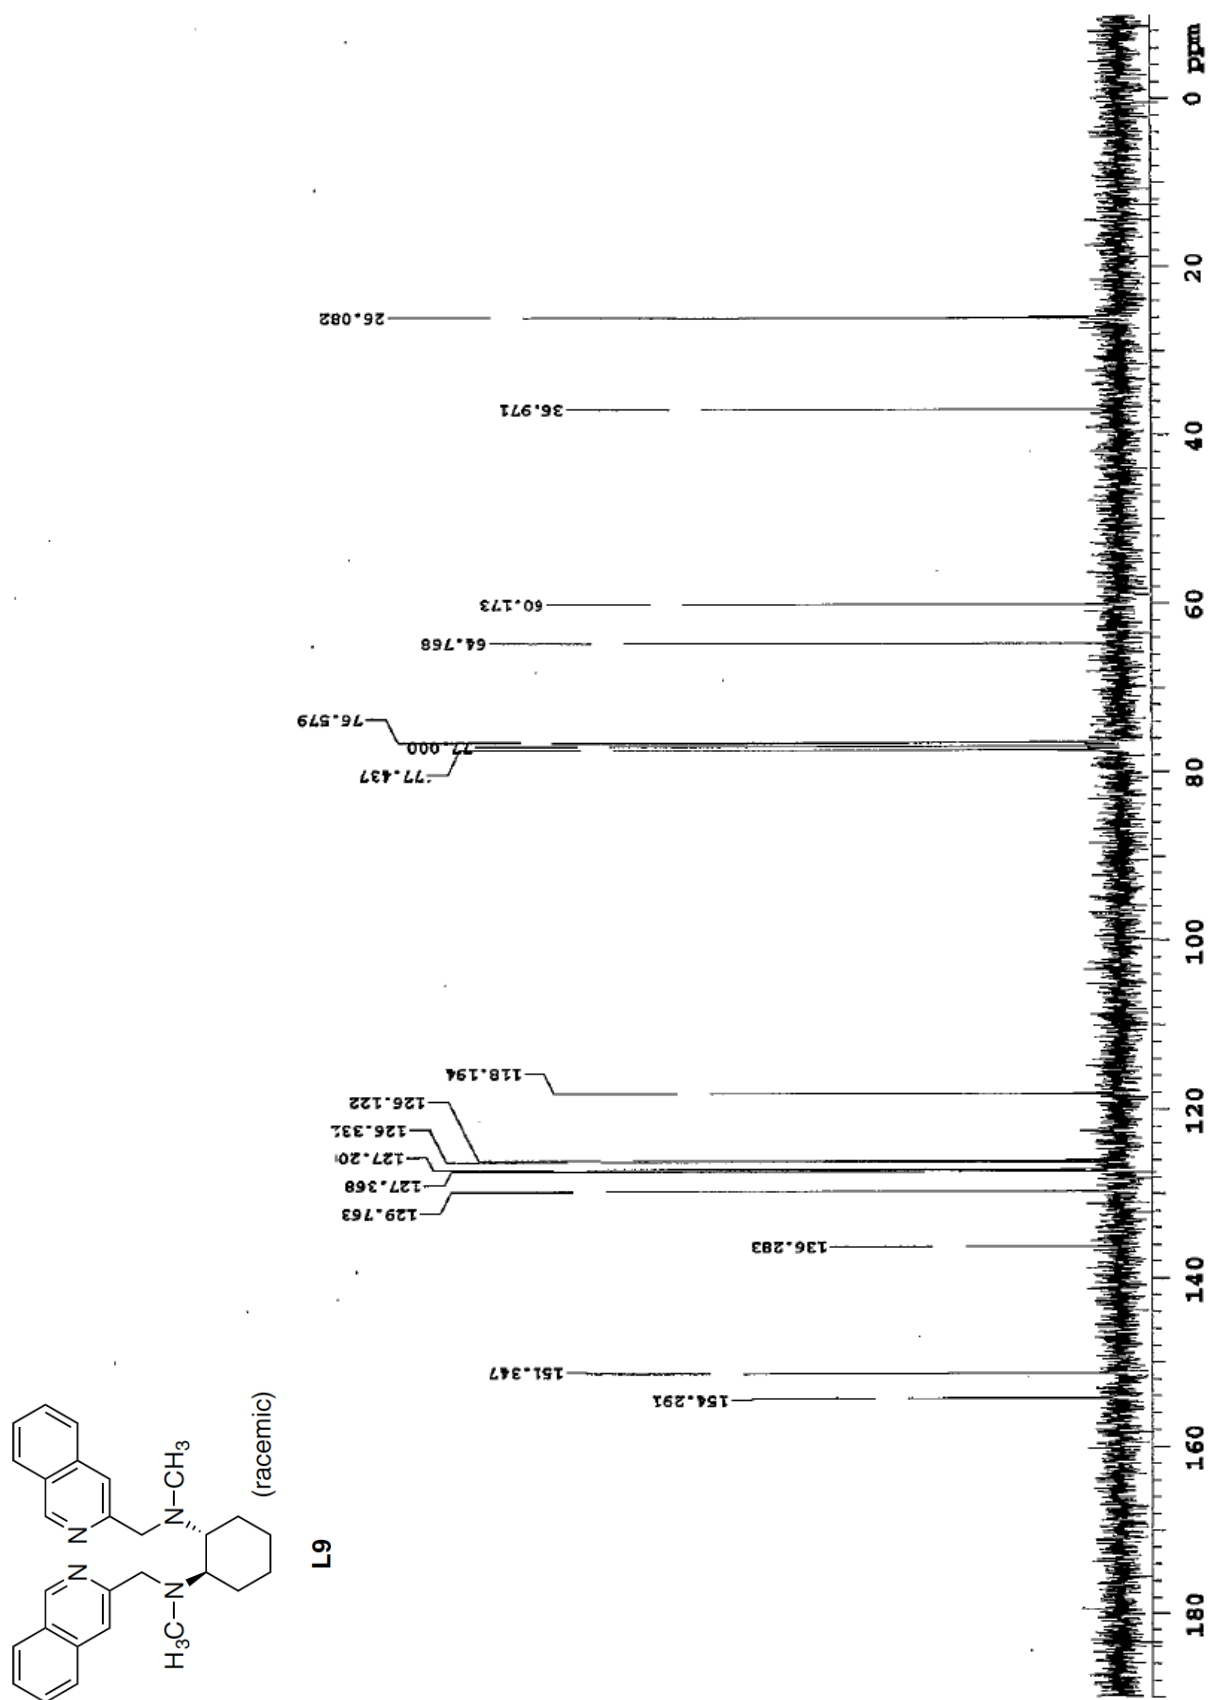

Figure S6. <sup>13</sup>C NMR spectrum of L9 in CDCl<sub>3</sub>.

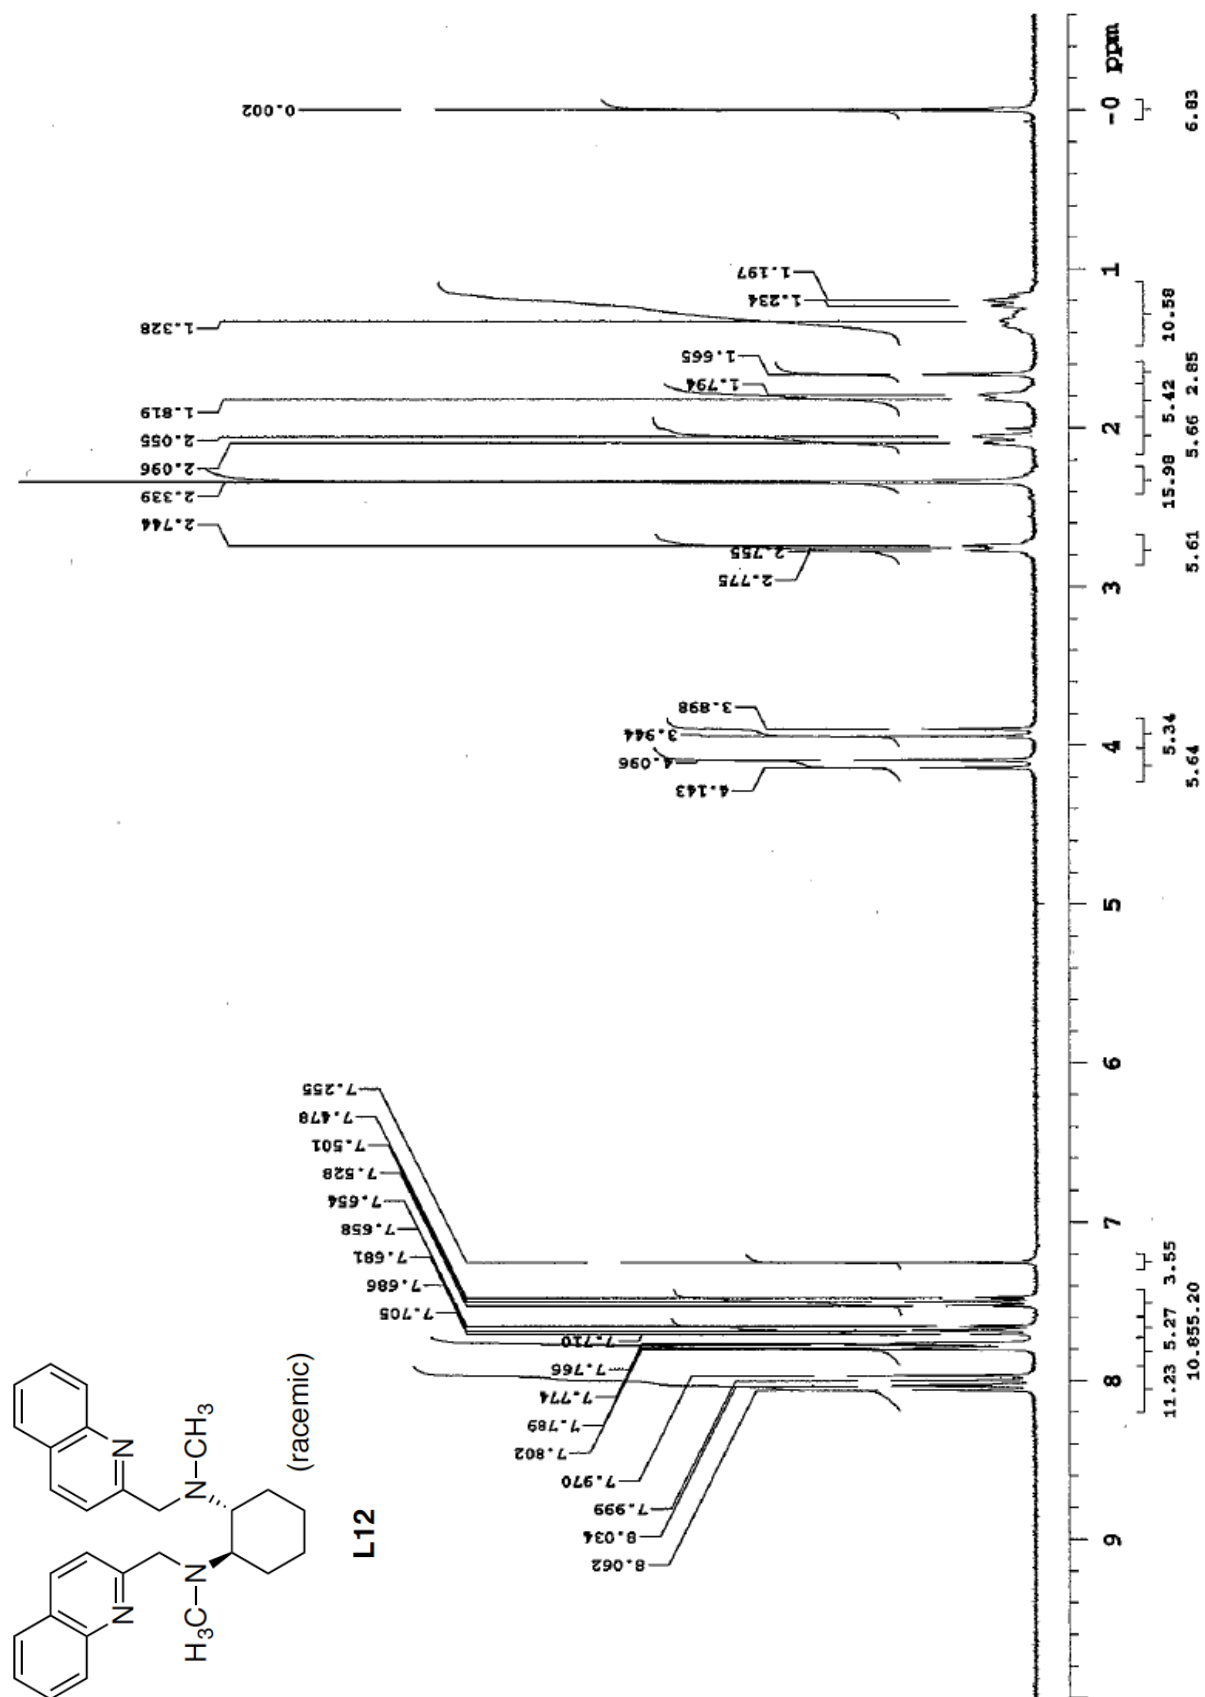

Figure S7. <sup>1</sup>H NMR spectrum of L12 in CDCl<sub>3</sub>.

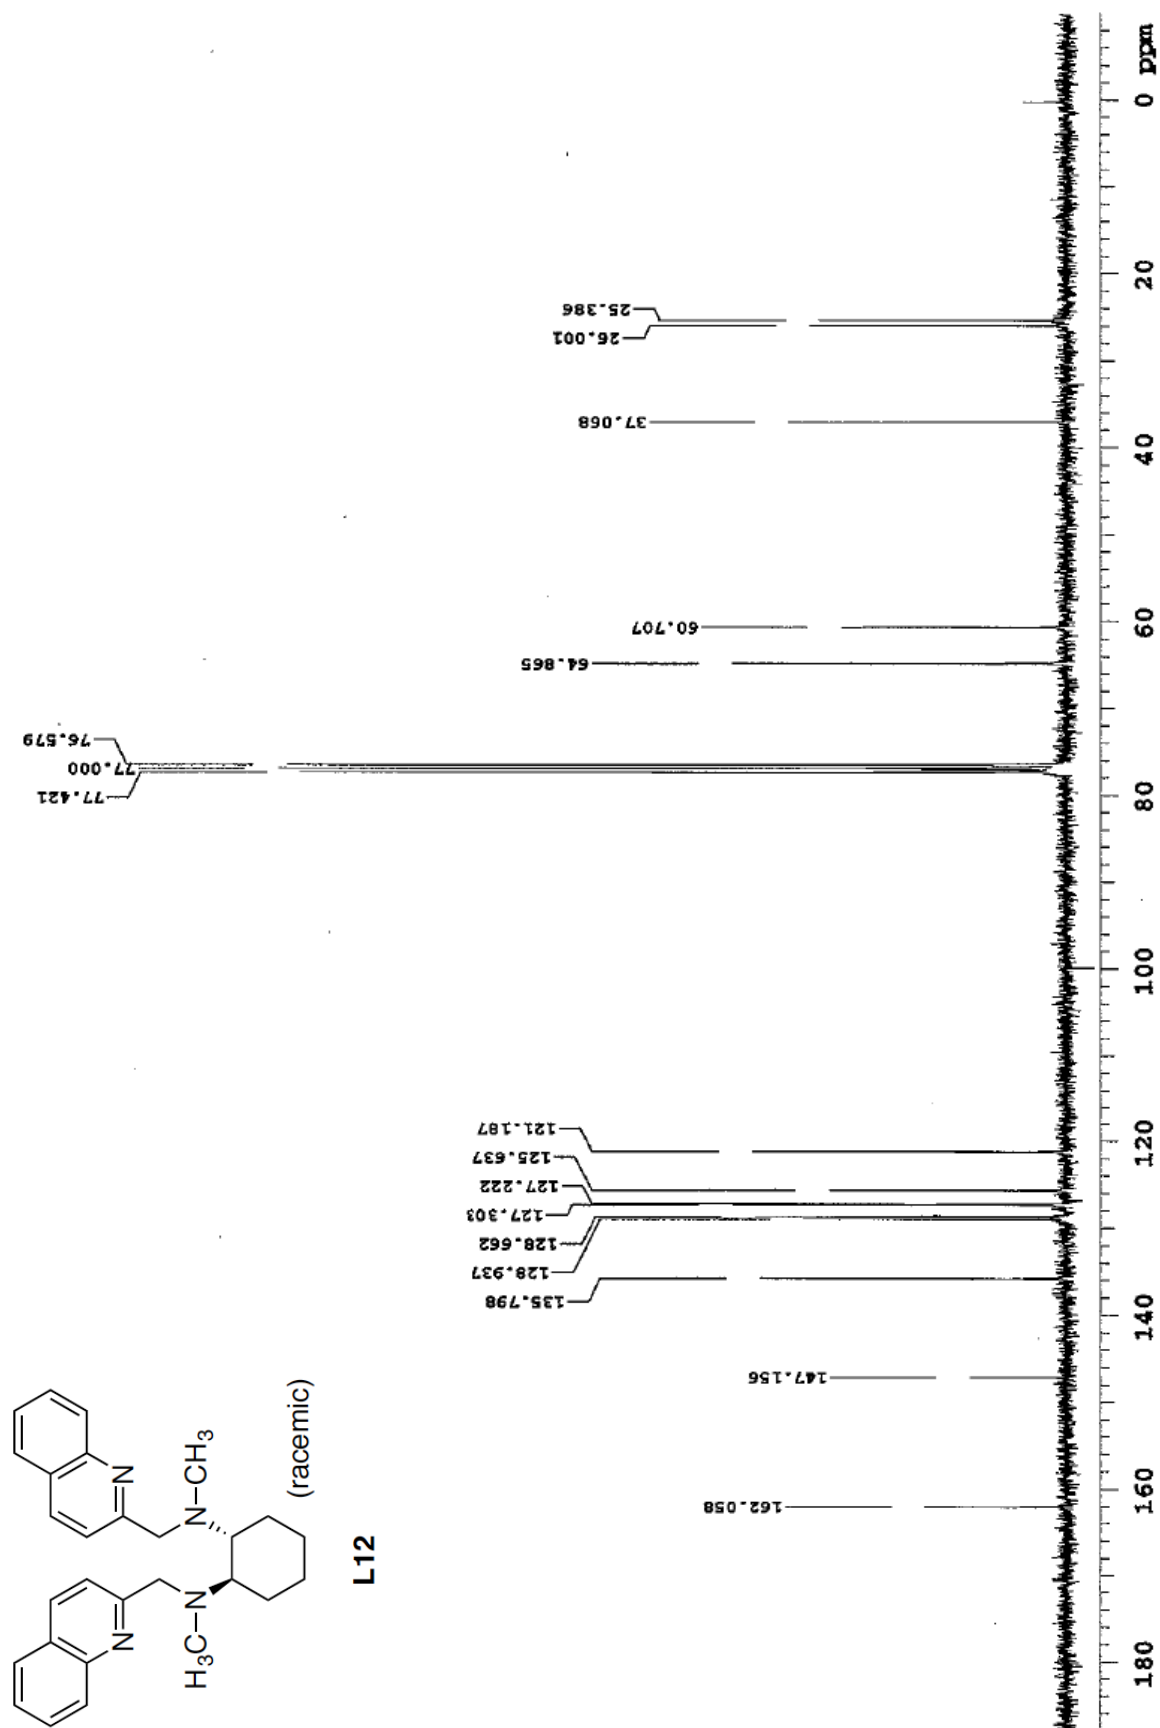

Figure S8. <sup>13</sup>C NMR spectrum of L12 in CDCl<sub>3</sub>

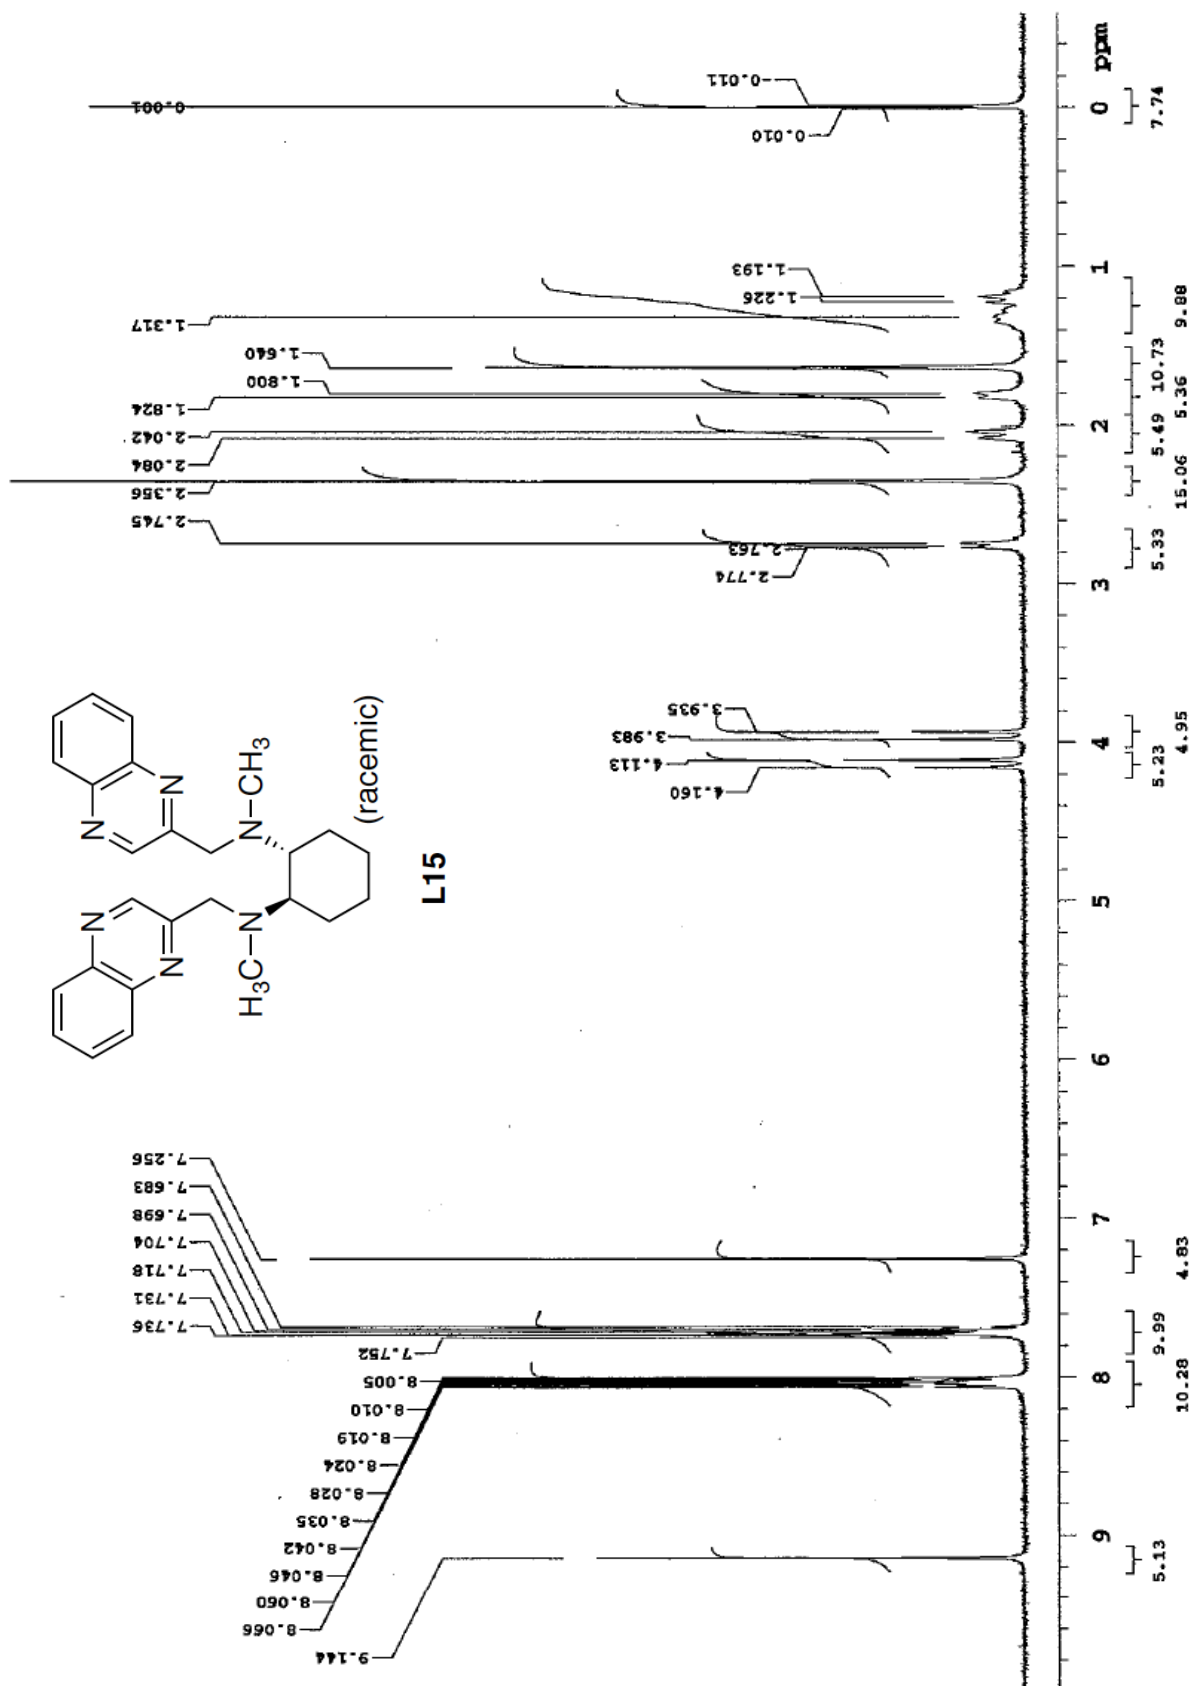

Figure S9. <sup>1</sup>H NMR spectrum of L15 in CDCl<sub>3</sub>.

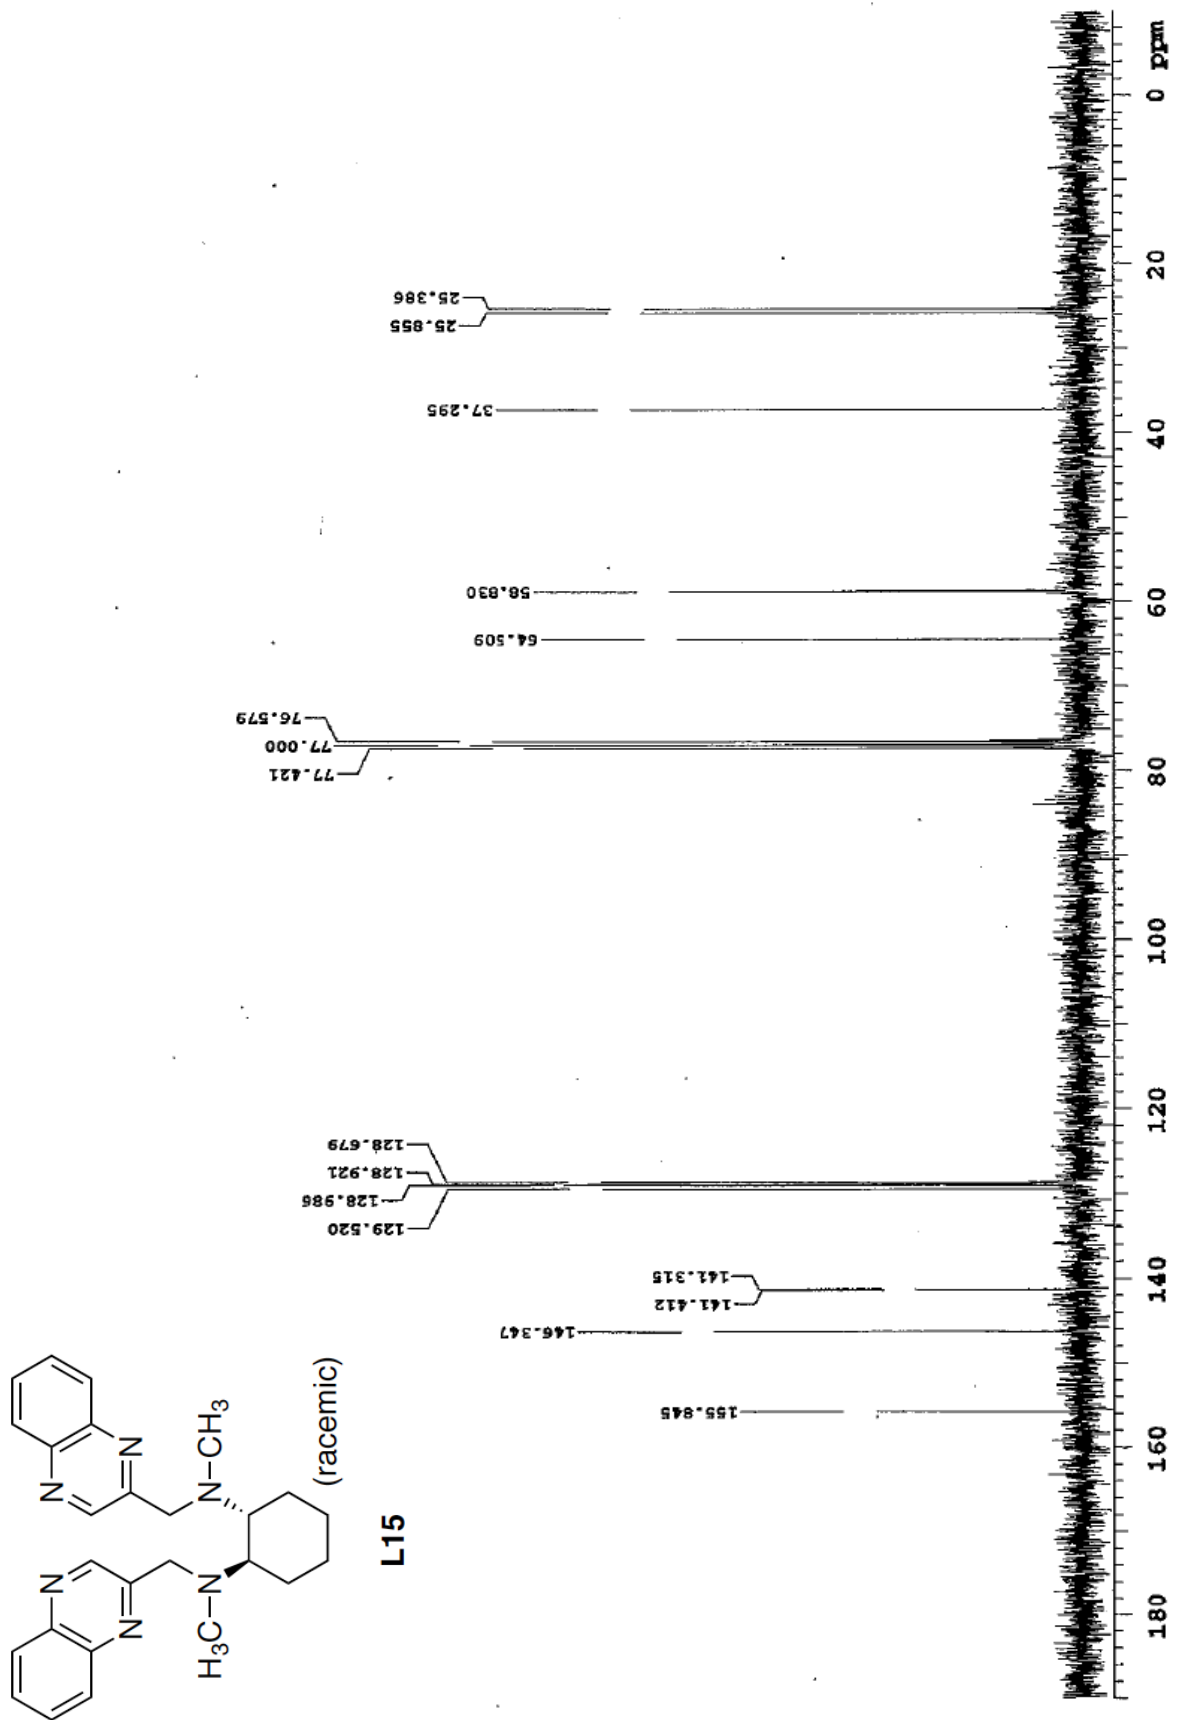

Figure S10. <sup>13</sup>C NMR spectrum of L15 in CDCl<sub>3</sub>.
